# Supplementary material for: Anti-Apolipoprotein A-1 IgG Influences Neutrophil Extracellular Trap Content at Distinct Regions of Human Carotid Plaques
Source: MDPI journal article supplement (doi:10.3390/ijms21207721), 2020-10-19
Supplement: s1 [file s1]

**Figure S1**

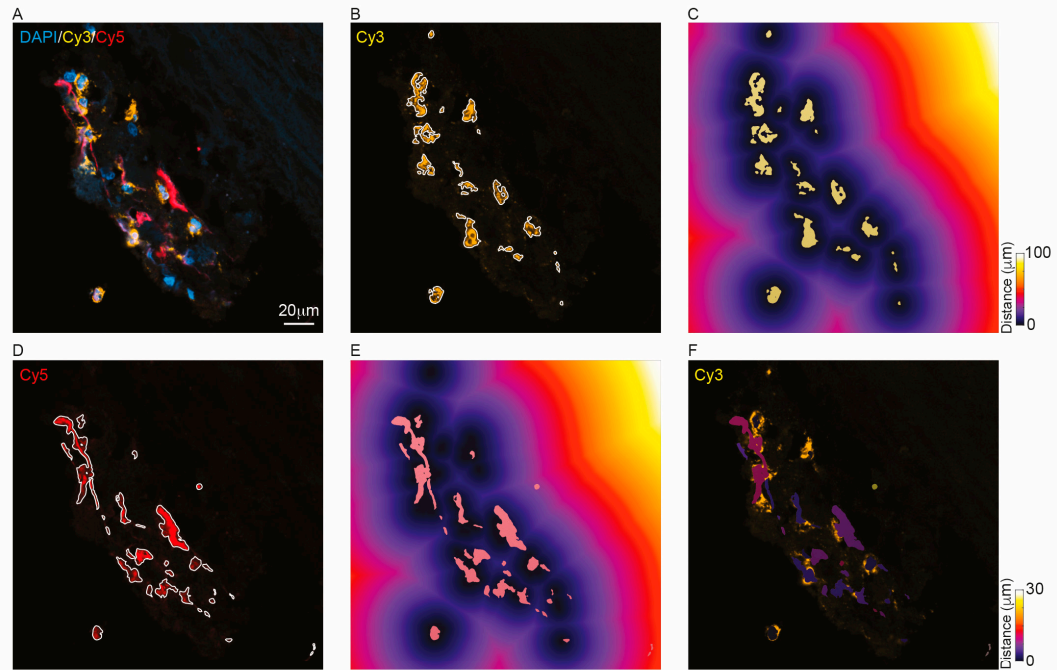

**Fig. S1. Estimation of the h3cit maximum distance to neutrophils.** (A) Overlay of the DAPI (blue), neutrophils labeled with Cy3 (yellow) and H3cit labeled with (Cy5). (B) Neutrophils boundary is indicated in white. (C) Distance map to the neutrophils (yellow surfaces) expressed in  $\mu\text{m}$  is color coded from dark purple (the closest) to white (the furthest). (D) H3cit presence is indicated in white. (E) Relative position of the H3cit with respect to the distance from the neutrophils (same map than in (C)). (F) Color-coding of each individual H3cit region based on the neutrophil maximum distance within this same region. The H3cit-neutrophil distance expressed in  $\mu\text{m}$  is color-coded from dark purple (the closest) to white (the furthest).

**Supplemental Figure 1.** Estimation of H3Cit maximum distance to neutrophils. (A) Overlay of DAPI (blue), neutrophils labelled with Cy3 (yellow) and H3Cit labelled with Cy5 (red). Neutrophils boundary is indicated in white. (C) Distance map to the neutrophils (yellow surfaces) expressed in  $\mu\text{m}$  is coded from dark purple (the closest) to white (the furthest). (D) H3Cit presence is indicated in white. (E) Relative position of the H3Cit with respect to the distance from the neutrophils (same map than in (C)). (F) Color-coding of each individual H3Cit region based on neutrophil maximum distance within this same region. The H3Cit-neutrophil distance expressed in  $\mu\text{m}$  is color-coded from dark purple (the closest) to white (the furthest).
